# Supplementary material for: The influence of water molecule coordination onto the water–aromatic interaction. Strong interactions of water coordinating to a metal ion
Source: Royal Society of Chemistry journal article supplement (doi:10.1039/c2ce25621e), 2012-12-18
Supplement: c2ce25621e.pdf [file c2ce25621e.pdf]

## Supplementary Information

### **The Influence of Water Molecule Coordination onto the Water/Aromatic Interaction. Strong Interactions of Water Coordinating to a Metal Ion**

Dubravka Z. Vojislavljević, Goran V. Janjić, Dragan B. Ninković, Agneš Kapor  
and Snežana D. Zarić

#### **I Optimized geometries and interaction energies of aqua-complex/benzene systems**

Starting with the aqua-complex/benzene geometries presented in Table 2 in main text, complete optimizations were performed, using B3LYP method with LANL2DZ basis set for metal atoms and 6-31G\*\* basis sets for the carbon, oxygen, chlorine and hydrogen atoms. Geometries obtained by optimization are shown in Figure S1.

Using optimized geometries interaction energies of benzene with aqua-complex were calculated by single point calculations at MP2/def2-QZVP level. The interaction energies are shown in Table S1. The most attractive interaction was obtained for hexaaqua complex with 2+ charge (Figure S1f); the energy is -21.65 kcal/mol.

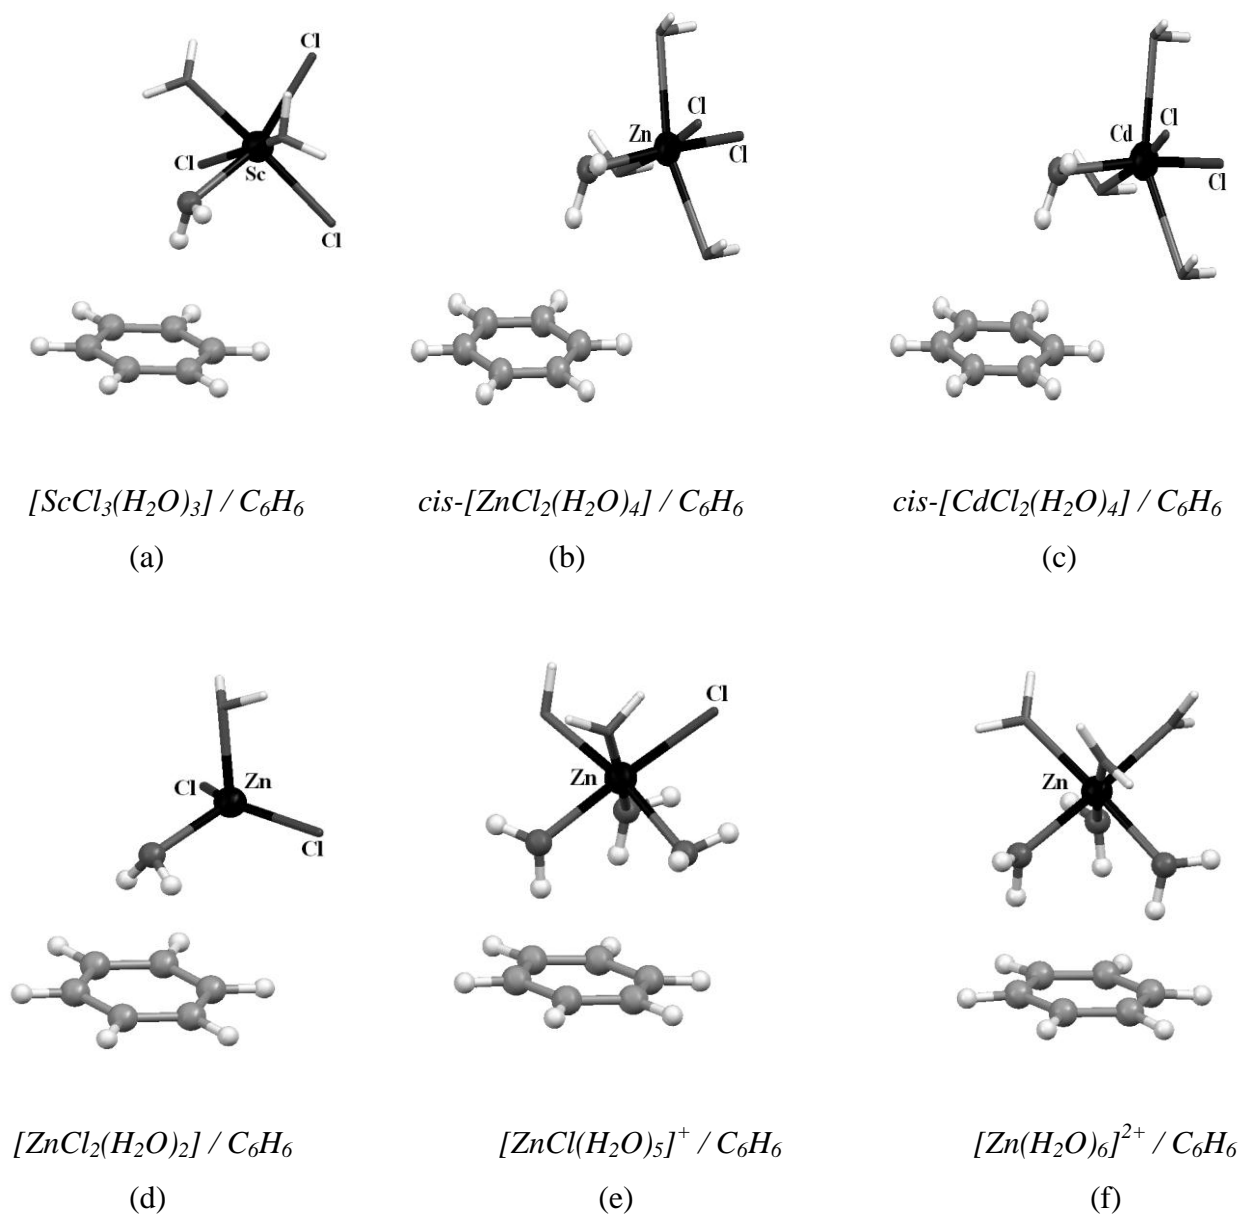

**Figure S1.** Optimized geometries of aqua-complex/benzene systems:  $[ScCl_3(H_2O)_3]/C_6H_6$  (a),  $cis-[ZnCl_2(H_2O)_4]/C_6H_6$  (b),  $cis-[CdCl_2(H_2O)_4]/C_6H_6$  (c),  $[ZnCl_2(H_2O)_2]/C_6H_6$  (d),  $[ZnCl(H_2O)_5]^+/C_6H_6$  (e) and  $[Zn(H_2O)_6]^{2+}/C_6H_6$  (f). Interaction energies are presented in Table S1.

**Table S1.** Interaction energies (in kcal/mol) in optimized aqua-complex/benzene geometries.

| Model systems                                                                            | $\Delta E$ |
|------------------------------------------------------------------------------------------|------------|
| <i>Neutral octahedral complexes</i>                                                      |            |
| [ScCl <sub>3</sub> (H <sub>2</sub> O) <sub>3</sub> ] / C <sub>6</sub> H <sub>6</sub>     | -9.24      |
| cis-[ZnCl <sub>2</sub> (H <sub>2</sub> O) <sub>4</sub> ] / C <sub>6</sub> H <sub>6</sub> | -6.96      |
| cis-[CdCl <sub>2</sub> (H <sub>2</sub> O) <sub>4</sub> ] / C <sub>6</sub> H <sub>6</sub> | -7.02      |
| <i>Neutral tetrahedral complex</i>                                                       |            |
| [ZnCl <sub>2</sub> (H <sub>2</sub> O) <sub>2</sub> ] / C <sub>6</sub> H <sub>6</sub>     | -9.44      |
| <i>Charged octahedral complexes</i>                                                      |            |
| [ZnCl(H <sub>2</sub> O) <sub>5</sub> ] <sup>+</sup> / C <sub>6</sub> H <sub>6</sub>      | -10.74     |
| [Zn(H <sub>2</sub> O) <sub>6</sub> ] <sup>2+</sup> / C <sub>6</sub> H <sub>6</sub>       | -21.65     |

*1. The coordinates of optimized [ScCl<sub>3</sub>(H<sub>2</sub>O)<sub>3</sub>] / C<sub>6</sub>H<sub>6</sub> system*

|    |               |               |               |
|----|---------------|---------------|---------------|
| 21 | -0.1857472148 | -0.1661031282 | 0.0485562144  |
| 8  | 1.8356348355  | 0.9673676608  | 0.1388465683  |
| 1  | 2.0633946878  | 0.8905297041  | 1.0804497226  |
| 1  | 2.5059971245  | 0.4631591209  | -0.3458101959 |
| 17 | -0.1719827659 | 0.3669151935  | 2.355755661   |
| 8  | 0.3493252595  | -0.0309563055 | -2.1696312413 |
| 1  | 0.4255560799  | -0.9429381578 | -2.4914040306 |
| 1  | -0.3641649217 | 0.3924757033  | -2.6687748846 |
| 8  | -0.689165381  | 1.9443980805  | -0.5292809957 |
| 1  | -0.0222027028 | 2.5802078752  | -0.2332587958 |
| 1  | -1.5461253127 | 2.2585665765  | -0.1793127367 |
| 17 | 1.0844505445  | -2.1564778354 | -0.1434106179 |
| 17 | -2.4002622233 | -0.6962544203 | -0.5119428228 |
| 6  | -2.4293183733 | 5.4975133755  | 0.4639335604  |
| 6  | -3.3217953285 | 4.8739643876  | -0.4116647593 |
| 6  | -3.7766656118 | 3.5799778629  | -0.1409107872 |
| 6  | -3.3385612077 | 2.9089321319  | 1.0078263703  |
| 6  | -2.4408368527 | 3.5348597199  | 1.8835415519  |
| 6  | -1.9873843289 | 4.8282983073  | 1.6092788592  |
| 1  | -2.0790686097 | 6.5044656129  | 0.2548135312  |
| 1  | -3.665091346  | 5.3952359499  | -1.3006611109 |
| 1  | -4.4729643895 | 3.0928959059  | -0.8173545395 |

|   |               |              |              |
|---|---------------|--------------|--------------|
| 1 | -3.6924480364 | 1.904387111  | 1.2202347401 |
| 1 | -2.093018392, | 3.0055373022 | 2.7650589354 |
| 1 | -1.2953065331 | 5.3155912655 | 2.2903468035 |

2. The coordinates of optimized *cis*-[ZnCl<sub>2</sub>(H<sub>2</sub>O)<sub>4</sub>] / C<sub>6</sub>H<sub>6</sub> system

|    |               |               |               |
|----|---------------|---------------|---------------|
| 30 | -0.0579876925 | -0.0596700853 | -0.253286672  |
| 8  | 2.1030245249  | -0.0129402285 | -0.2523937486 |
| 1  | 2.2778280533  | 0.0359065959  | 0.7034041614  |
| 1  | 2.5072135476  | 0.7733137319  | -0.6607194693 |
| 17 | 0.1928570286  | -0.1386304567 | 2.1586388734  |
| 8  | 0.269609956   | -0.0577215392 | -2.4447327214 |
| 1  | 0.6457894075  | -0.8983120728 | -2.7413440165 |
| 1  | -0.6836932254 | -0.0860426776 | -2.6645425196 |
| 8  | -0.4536515723 | 2.095047506   | 0.0330722659  |
| 1  | -0.4737656112 | 2.070981546   | 1.0068329457  |
| 1  | -1.3868704574 | 2.0841926138  | -0.2482977835 |
| 8  | -0.3493411828 | -2.2377759318 | -0.1629790517 |
| 1  | -1.3125376362 | -2.2253457699 | -0.312021919  |
| 1  | -0.2368073209 | -2.3563159253 | 0.7963924567  |
| 17 | -2.4089997802 | -0.072611156  | -1.0735673126 |
| 6  | 5.3542192985  | 2.6135876028  | -1.9068002497 |
| 6  | 5.0761303122  | 3.3377548422  | -0.7440579446 |
| 6  | 3.7528540781  | 3.5848237811  | -0.3732213932 |
| 6  | 2.7020086055  | 3.1107196176  | -1.1667992991 |
| 6  | 2.9816922834  | 2.3850284955  | -2.3326606575 |
| 6  | 4.3088937565  | 2.1357881061  | -2.6993960743 |
| 1  | 6.3842696663  | 2.4216700604  | -2.1932828067 |
| 1  | 5.8905410678  | 3.708163769   | -0.1280356198 |
| 1  | 3.5374503255  | 4.1498765169  | 0.5291670184  |
| 1  | 1.670825388   | 3.3014617273  | -0.8832615373 |
| 1  | 2.1651845537  | 2.0149341714  | -2.9464960703 |
| 1  | 4.5253116256  | 1.5741221592  | -3.603711855  |

3. The coordinates of optimized *cis*-[CdCl<sub>2</sub>(H<sub>2</sub>O)<sub>4</sub>] / C<sub>6</sub>H<sub>6</sub> system

|    |           |           |           |
|----|-----------|-----------|-----------|
| 48 | 0.113199  | -0.047198 | -0.323172 |
| 8  | 2.446061  | -0.171320 | -0.187538 |
| 1  | 2.512829  | -0.104424 | 0.781585  |
| 1  | 2.921168  | 0.592963  | -0.557098 |
| 17 | 0.382419  | -0.032924 | 2.235822  |
| 8  | 0.529823  | -0.057879 | -2.679557 |
| 1  | 0.836576  | -0.892474 | -3.058928 |
| 1  | -0.428387 | 0.000076  | -2.874044 |

|    |           |           |           |
|----|-----------|-----------|-----------|
| 8  | -0.256355 | 2.294546  | 0.052882  |
| 1  | -0.293568 | 2.210923  | 1.022310  |
| 1  | -1.180351 | 2.321936  | -0.249634 |
| 8  | -0.549925 | -2.309150 | -0.003016 |
| 1  | -1.487317 | -2.185455 | -0.231815 |
| 1  | -0.513447 | -2.321194 | 0.968477  |
| 17 | -2.256602 | 0.123663  | -1.383806 |
| 6  | 5.709051  | 2.421143  | -1.619429 |
| 6  | 5.408138  | 3.163507  | -0.474322 |
| 6  | 4.079982  | 3.463231  | -0.163252 |
| 6  | 3.047676  | 3.025027  | -0.999661 |
| 6  | 3.349822  | 2.282346  | -2.149206 |
| 6  | 4.681442  | 1.979122  | -2.455396 |
| 1  | 6.742398  | 2.187183  | -1.858904 |
| 1  | 6.208224  | 3.506256  | 0.175571  |
| 1  | 3.846962  | 4.040221  | 0.727066  |
| 1  | 2.013341  | 3.256193  | -0.760926 |
| 1  | 2.548074  | 1.940851  | -2.798398 |
| 1  | 4.915488  | 1.403456  | -3.346452 |

*4. The coordinates of optimized [ZnCl<sub>2</sub>(H<sub>2</sub>O)<sub>2</sub>] / C<sub>6</sub>H<sub>6</sub> system*

|    |               |               |               |
|----|---------------|---------------|---------------|
| 30 | -0.9221674282 | 0.1564276472  | 0.3585148035  |
| 17 | 0.034901879   | 1.1776186447  | 2.1320698871  |
| 8  | -0.4121688648 | 1.4799203398  | -1.1973194775 |
| 1  | -0.0420937437 | 2.2912732157  | -0.8167102972 |
| 1  | -1.1787996525 | 1.7721581005  | -1.7226557303 |
| 8  | 0.3521235221  | -1.5640469408 | 0.2437811671  |
| 1  | -0.2043402845 | -2.3549751885 | 0.180849533   |
| 1  | 0.8618537939  | -1.6314407169 | 1.0650709434  |
| 17 | -2.8653768574 | -0.8415156774 | -0.1952597501 |
| 6  | -1.4593694972 | 4.7727349937  | -1.8309222349 |
| 6  | -1.8081182395 | 4.646975426   | -0.4824555363 |
| 6  | -2.792563721  | 3.731949584   | -0.0945685221 |
| 6  | -3.4283622073 | 2.9394095683  | -1.0546359016 |
| 6  | -3.0793379241 | 3.0643295299  | -2.4057192902 |
| 6  | -2.0959709911 | 3.9823927508  | -2.7939768601 |
| 1  | -0.6988080022 | 5.4876706132  | -2.1317572527 |
| 1  | -1.3158502794 | 5.2611861661  | 0.2659643323  |
| 1  | -3.055880156  | 3.6305562396  | 0.9537803721  |
| 1  | -4.1775854397 | 2.2141646991  | -0.753882979  |
| 1  | -3.5790426958 | 2.4529257513  | -3.1517280685 |
| 1  | -1.8299722107 | 4.0828182537  | -3.8424101379 |

5. The coordinates of optimized  $[ZnCl(H_2O)_5]^+ / C_6H_6$  system

|    |               |               |               |
|----|---------------|---------------|---------------|
| 30 | 0.2713237447  | 0.0493243615  | -0.0428204309 |
| 8  | 2.1883024849  | 1.1324632089  | -0.0508730529 |
| 1  | 2.4495919374  | 1.2045517697  | 0.8808609809  |
| 1  | 2.9730148119  | 0.8752696189  | -0.5689173377 |
| 17 | 0.0947061752  | 0.4418354053  | 2.2443763827  |
| 8  | 0.4999531091  | -0.3808284876 | -2.1134329129 |
| 1  | 1.3575556664  | -0.7051893073 | -2.446876876  |
| 1  | 0.2256708541  | 0.3391997156  | -2.6985841328 |
| 8  | -0.3460015686 | 2.0384722412  | -0.7760258586 |
| 1  | 0.4582428019  | 2.5540727685  | -0.6024451281 |
| 1  | -1.0428939103 | 2.4627617479  | -0.2537770513 |
| 8  | 1.0302344563  | -1.947984877  | 0.3817809115  |
| 1  | 0.452647071   | -2.6827639187 | 0.1291220244  |
| 1  | 1.0489529568  | -1.9434147731 | 1.3548286474  |
| 8  | -1.7684975498 | -0.705166074  | -0.0276625935 |
| 1  | -2.1312834087 | -0.5437123897 | 0.8578385816  |
| 1  | -2.4946010126 | -0.6689065999 | -0.6639511527 |
| 6  | 4.7378017128  | -0.9576274823 | -1.1136442621 |
| 6  | 4.8130523989  | 0.2722091147  | -1.7836583152 |
| 6  | 4.163582697   | 0.4340328468  | -3.0147217033 |
| 6  | 3.4584990852  | -0.6353588874 | -3.5810206751 |
| 6  | 3.3944155342  | -1.8653682269 | -2.9116993589 |
| 6  | 4.0258248815  | -2.021691511  | -1.6720256607 |
| 1  | 5.2587288278  | -1.0886942125 | -0.1693478089 |
| 1  | 5.4067486729  | 1.0835168242  | -1.3713556214 |
| 1  | 4.2392308785  | 1.3780554184  | -3.5465118042 |
| 1  | 3.0028056493  | -0.5256276038 | -4.561624877  |
| 1  | 2.8823498198  | -2.7076269744 | -3.3692366427 |
| 1  | 3.9841974623  | -2.9760331209 | -1.1572908784 |

6. The coordinates of optimized  $[Zn(H_2O)_6]^{2+} / C_6H_6$  system

|    |               |               |               |
|----|---------------|---------------|---------------|
| 30 | 0.1946230266  | 0.3276813405  | 0.0196494016  |
| 8  | 2.1432467044  | 1.1374996695  | -0.2451142055 |
| 1  | 2.8232129697  | 1.0381800198  | 0.4504144819  |
| 1  | 2.6092038084  | 1.1139042737  | -1.0932878381 |
| 8  | 0.2872725932  | 0.7452400584  | 2.1023215238  |
| 1  | 0.0400494311  | 1.6031355737  | 2.4765366019  |
| 1  | 1.0227786959  | 0.4034272844  | 2.6482856632  |
| 8  | 0.0395956389  | -0.2375352604 | -2.03023524   |
| 1  | 0.3741709528  | -1.075143808  | -2.3813616346 |
| 1  | -0.263817472  | 0.2936339199  | -2.7799800201 |
| 8  | -0.5344683205 | 2.2752982699  | -0.4458373642 |

|   |               |               |               |
|---|---------------|---------------|---------------|
| 1 | 0.0416152341  | 3.0395607344  | -0.5900658217 |
| 1 | -1.4491238556 | 2.5906101388  | -0.462084534  |
| 8 | 1.0293465006  | -1.6000252181 | 0.3568496696  |
| 1 | 0.4930698516  | -2.3676308243 | 0.6024733196  |
| 1 | 1.8855520818  | -1.6984689394 | 0.8182754542  |
| 8 | -1.7954297656 | -0.350895985  | 0.3647000934  |
| 1 | -2.1986506639 | -0.4085866086 | 1.2427029488  |
| 1 | -2.4140268512 | -0.7430796583 | -0.2676418311 |
| 6 | 4.4815354366  | -0.6605548846 | 1.4922162668  |
| 6 | 3.8096974607  | -1.7682953835 | 2.0350076444  |
| 6 | 3.0014070969  | -1.6079445759 | 3.1680395638  |
| 6 | 2.8590804243  | -0.3415154206 | 3.7588572237  |
| 6 | 3.5304346838  | 0.761679033   | 3.2155008556  |
| 6 | 4.3414756112  | 0.6037627782  | 2.0795127944  |
| 1 | 5.1534594125  | -0.797217571  | 0.6493323267  |
| 1 | 3.983864491   | -2.7601513759 | 1.6249440942  |
| 1 | 2.5274647183  | -2.4724680424 | 3.6247287371  |
| 1 | 2.2956635241  | -0.2364003167 | 4.6828477956  |
| 1 | 3.4689136702  | 1.7303344648  | 3.703894246   |
| 1 | 4.922401597   | 1.4449333391  | 1.7091003257  |

## II The coordinates of water/benzene and aqua-complex/benzene systems from Table 2.

1. The coordinates of  $H_2O / C_6H_6$  system, with  $r=0.0 \text{ \AA}$  and  $R=2.3 \text{ \AA}$

|   |           |           |           |
|---|-----------|-----------|-----------|
| 8 | -0.186925 | -1.878217 | -0.133582 |
| 1 | 0.300096  | -2.263623 | 0.604882  |
| 1 | 0.329691  | -2.130366 | -0.908574 |
| 6 | 2.405888  | -3.696377 | 1.473728  |
| 6 | 2.582515  | -2.423479 | 2.021580  |
| 6 | 1.637672  | -1.909440 | 2.913007  |
| 6 | 0.516201  | -2.668299 | 3.256583  |
| 6 | 0.339574  | -3.941198 | 2.708731  |
| 6 | 1.284418  | -4.455237 | 1.817304  |
| 1 | 3.141068  | -4.096349 | 0.780112  |
| 1 | 3.455127  | -1.833013 | 1.754245  |
| 1 | 1.775104  | -0.919003 | 3.339289  |
| 1 | -0.218979 | -2.268328 | 3.950199  |
| 1 | -0.533038 | -4.531663 | 2.976066  |
| 1 | 1.146985  | -5.445674 | 1.391022  |

2. The coordinates of  $H_2O / C_6H_6$  system, with  $r=0.6 \text{ \AA}$  and  $R=2.4 \text{ \AA}$

|   |           |           |           |
|---|-----------|-----------|-----------|
| 8 | -0.186925 | -1.878217 | -0.133582 |
| 1 | 0.300096  | -2.263623 | 0.604882  |
| 1 | 0.329691  | -2.130366 | -0.908574 |
| 6 | 0.160872  | -2.487466 | 3.715975  |
| 6 | -0.015755 | -3.760365 | 3.168123  |
| 6 | 0.929089  | -4.274404 | 2.276695  |
| 6 | 2.050560  | -3.515544 | 1.933120  |
| 6 | 2.227187  | -2.242646 | 2.480972  |
| 6 | 1.282343  | -1.728607 | 3.372399  |
| 1 | -0.574308 | -2.087495 | 4.409591  |
| 1 | -0.888367 | -4.350830 | 3.435458  |
| 1 | 0.791656  | -5.264841 | 1.850414  |
| 1 | 2.785739  | -3.915516 | 1.239504  |
| 1 | 3.099799  | -1.652180 | 2.213637  |
| 1 | 1.419775  | -0.738170 | 3.798680  |

3. The coordinates of  $[ScCl_3(H_2O)_3] / C_6H_6$  system, with  $r=0.0 \text{ \AA}$  and  $R=2.9 \text{ \AA}$

|    |           |           |           |
|----|-----------|-----------|-----------|
| 21 | -0.078925 | -0.077714 | 0.079922  |
| 8  | 2.171682  | 0.312678  | -0.055828 |
| 1  | 2.551836  | 0.005408  | 0.782244  |
| 1  | 2.580316  | -0.209194 | -0.761536 |
| 17 | 0.314909  | 0.313209  | 2.369099  |
| 8  | 0.311972  | 0.053190  | -2.171851 |
| 1  | 0.010347  | -0.789829 | -2.545763 |
| 1  | -0.217830 | 0.751608  | -2.582865 |
| 8  | 0.055831  | 2.173135  | -0.310809 |
| 1  | 0.756509  | 2.582043  | 0.217631  |
| 1  | -0.785407 | 2.550634  | -0.008842 |
| 17 | 0.310738  | -2.367803 | -0.312471 |
| 17 | -2.367980 | 0.316634  | -0.312932 |
| 6  | 2.547164  | 5.051480  | 1.245283  |
| 6  | 3.492337  | 4.226903  | 0.630198  |
| 6  | 3.800181  | 2.982382  | 1.185184  |
| 6  | 3.162851  | 2.562438  | 2.355256  |
| 6  | 2.217678  | 3.387015  | 2.970341  |
| 6  | 1.909834  | 4.631536  | 2.415355  |
| 1  | 2.307632  | 6.019836  | 0.813451  |
| 1  | 3.988241  | 4.553659  | -0.280230 |
| 1  | 4.535616  | 2.340782  | 0.706589  |
| 1  | 3.402383  | 1.594082  | 2.787088  |
| 1  | 1.721774  | 3.060259  | 3.880769  |
| 1  | 1.174399  | 5.273136  | 2.893950  |



4. The coordinates of  $[\text{ScCl}_3(\text{H}_2\text{O})_3] / \text{C}_6\text{H}_6$  system, with  $r=0.6 \text{ \AA}$  and  $R=2.5 \text{ \AA}$

|    |           |           |           |
|----|-----------|-----------|-----------|
| 21 | -0.078925 | -0.077714 | 0.079922  |
| 8  | 2.171682  | 0.312678  | -0.055828 |
| 1  | 2.551836  | 0.005408  | 0.782244  |
| 1  | 2.580316  | -0.209194 | -0.761536 |
| 17 | 0.314909  | 0.313209  | 2.369099  |
| 8  | 0.311972  | 0.053190  | -2.171851 |
| 1  | 0.010347  | -0.789829 | -2.545763 |
| 1  | -0.217830 | 0.751608  | -2.582865 |
| 8  | 0.055831  | 2.173135  | -0.310809 |
| 1  | 0.756509  | 2.582043  | 0.217631  |
| 1  | -0.785407 | 2.550634  | -0.008842 |
| 17 | 0.310738  | -2.367803 | -0.312471 |
| 17 | -2.367980 | 0.316634  | -0.312932 |
| 6  | -0.794551 | 2.115464  | -5.418029 |
| 6  | -1.962730 | 1.475653  | -4.996592 |
| 6  | -2.517873 | 1.783763  | -3.752208 |
| 6  | -1.904837 | 2.731683  | -2.929259 |
| 6  | -0.736658 | 3.371493  | -3.350696 |
| 6  | -0.181515 | 3.063384  | -4.595081 |
| 1  | -0.362596 | 1.875725  | -6.386280 |
| 1  | -2.439731 | 0.738081  | -5.636925 |
| 1  | -3.426829 | 1.285929  | -3.424289 |
| 1  | -2.336792 | 2.971422  | -1.961009 |
| 1  | -0.259657 | 4.109066  | -2.710363 |
| 1  | 0.727441  | 3.561217  | -4.922999 |

5. The coordinates of *cis*- $[\text{ZnCl}_2(\text{H}_2\text{O})_4] / \text{C}_6\text{H}_6$  system, with  $r=0.0 \text{ \AA}$  and  $R=2.3 \text{ \AA}$

|    |           |           |           |
|----|-----------|-----------|-----------|
| 30 | 0.230000  | 0.007000  | -0.226000 |
| 8  | 2.422000  | -0.041000 | -0.419000 |
| 1  | 2.608000  | -0.050000 | 0.540000  |
| 1  | 2.776000  | 0.791000  | -0.763000 |
| 17 | 0.803000  | -0.117000 | 2.141000  |
| 8  | 0.386000  | -0.066000 | -2.421000 |
| 1  | 0.679000  | -0.934000 | -2.734000 |
| 1  | -0.574000 | -0.016000 | -2.592000 |
| 8  | 0.202000  | 2.188000  | 0.071000  |
| 1  | 0.253000  | 2.179000  | 1.043000  |
| 1  | -0.734000 | 2.357000  | -0.139000 |

|    |           |           |           |
|----|-----------|-----------|-----------|
| 8  | -0.181000 | -2.150000 | -0.082000 |
| 1  | -1.152000 | -2.093000 | -0.121000 |
| 1  | 0.035000  | -2.281000 | 0.858000  |
| 17 | -2.139000 | 0.228000  | -0.770000 |
| 6  | 4.908634  | 2.250461  | -1.510216 |
| 6  | 4.369956  | 2.930591  | -0.415292 |
| 6  | 3.075326  | 3.450963  | -0.484251 |
| 6  | 2.319375  | 3.291206  | -1.648134 |
| 6  | 2.858052  | 2.611077  | -2.743058 |
| 6  | 4.152682  | 2.090704  | -2.674099 |
| 1  | 5.915980  | 1.845562  | -1.456560 |
| 1  | 4.958159  | 3.054897  | 0.490321  |
| 1  | 2.656183  | 3.980169  | 0.367705  |
| 1  | 1.312028  | 3.696106  | -1.701790 |
| 1  | 2.269849  | 2.486770  | -3.648671 |
| 1  | 4.571825  | 1.561499  | -3.526055 |

6. The coordinates of *cis*-[ZnCl<sub>2</sub>(H<sub>2</sub>O)<sub>4</sub>] / C<sub>6</sub>H<sub>6</sub> system, with *r*=0.6 Å and *R*=2.2 Å

|    |           |           |           |
|----|-----------|-----------|-----------|
| 30 | 0.230000  | 0.007000  | -0.226000 |
| 8  | 2.422000  | -0.041000 | -0.419000 |
| 1  | 2.608000  | -0.050000 | 0.540000  |
| 1  | 2.776000  | 0.791000  | -0.763000 |
| 17 | 0.803000  | -0.117000 | 2.141000  |
| 8  | 0.386000  | -0.066000 | -2.421000 |
| 1  | 0.679000  | -0.934000 | -2.734000 |
| 1  | -0.574000 | -0.016000 | -2.592000 |
| 8  | 0.202000  | 2.188000  | 0.071000  |
| 1  | 0.253000  | 2.179000  | 1.043000  |
| 1  | -0.734000 | 2.357000  | -0.139000 |
| 8  | -0.181000 | -2.150000 | -0.082000 |
| 1  | -1.152000 | -2.093000 | -0.121000 |
| 1  | 0.035000  | -2.281000 | 0.858000  |
| 17 | -2.139000 | 0.228000  | -0.770000 |
| 6  | 5.428181  | 1.940898  | -1.445087 |
| 6  | 4.672229  | 1.781141  | -2.608970 |
| 6  | 3.377599  | 2.301513  | -2.677929 |
| 6  | 2.838921  | 2.981643  | -1.583005 |
| 6  | 3.594873  | 3.141400  | -0.419122 |
| 6  | 4.889503  | 2.621027  | -0.350163 |
| 1  | 6.435527  | 1.535999  | -1.391431 |
| 1  | 5.091372  | 1.251935  | -3.460926 |
| 1  | 2.789396  | 2.177207  | -3.583541 |
| 1  | 1.831575  | 3.386542  | -1.636661 |
| 1  | 3.175730  | 3.670605  | 0.432835  |
| 1  | 5.477706  | 2.745334  | 0.555450  |

7. The coordinates of *cis*-[CdCl<sub>2</sub>(H<sub>2</sub>O)<sub>4</sub>] / C<sub>6</sub>H<sub>6</sub> system, with *r*=0.0 Å and *R*=2.3 Å

|    |           |           |           |
|----|-----------|-----------|-----------|
| 48 | 0.280048  | -0.002515 | -0.281720 |
| 8  | 2.648013  | -0.054534 | -0.386562 |
| 1  | 2.731095  | -0.076217 | 0.588068  |
| 1  | 3.090375  | 0.752882  | -0.681366 |
| 17 | 0.965336  | -0.116765 | 2.208727  |
| 8  | 0.392699  | -0.062103 | -2.649408 |
| 1  | 0.645859  | -0.896789 | -3.065994 |
| 1  | -0.578958 | 0.010001  | -2.738273 |
| 8  | 0.060987  | 2.326832  | 0.163404  |
| 1  | 0.122180  | 2.280294  | 1.132547  |
| 1  | -0.887236 | 2.403991  | -0.038923 |
| 8  | -0.297615 | -2.283495 | 0.078378  |
| 1  | -1.262658 | -2.187585 | 0.011798  |
| 1  | -0.099458 | -2.317193 | 1.030026  |
| 17 | -2.196668 | 0.223197  | -0.984702 |
| 6  | 5.383058  | 2.048395  | -1.236336 |
| 6  | 4.822069  | 2.747089  | -0.164549 |
| 6  | 3.581738  | 3.372913  | -0.311283 |
| 6  | 2.902395  | 3.300043  | -1.529804 |
| 6  | 3.463384  | 2.601349  | -2.601591 |
| 6  | 4.703716  | 1.975525  | -2.454857 |
| 1  | 6.348155  | 1.561444  | -1.122163 |
| 1  | 5.350663  | 2.803788  | 0.783577  |
| 1  | 3.145234  | 3.916564  | 0.522670  |
| 1  | 1.937298  | 3.786994  | -1.643977 |
| 1  | 2.934791  | 2.544649  | -3.549717 |
| 1  | 5.140220  | 1.431874  | -3.288810 |

8. The coordinates of *cis*-[CdCl<sub>2</sub>(H<sub>2</sub>O)<sub>4</sub>] / C<sub>6</sub>H<sub>6</sub> system, with *r*=0.6 Å and *R*=2.3 Å

|    |           |           |           |
|----|-----------|-----------|-----------|
| 48 | 0.280048  | -0.002515 | -0.281720 |
| 8  | 2.648013  | -0.054534 | -0.386562 |
| 1  | 2.731095  | -0.076217 | 0.588068  |
| 1  | 3.090375  | 0.752882  | -0.681366 |
| 17 | 0.965336  | -0.116765 | 2.208727  |
| 8  | 0.392699  | -0.062103 | -2.649408 |
| 1  | 0.645859  | -0.896789 | -3.065994 |
| 1  | -0.578958 | 0.010001  | -2.738273 |
| 8  | 0.060987  | 2.326832  | 0.163404  |
| 1  | 0.122180  | 2.280294  | 1.132547  |
| 1  | -0.887236 | 2.403991  | -0.038923 |
| 8  | -0.297615 | -2.283495 | 0.078378  |

|    |           |           |           |
|----|-----------|-----------|-----------|
| 1  | -1.262658 | -2.187585 | 0.011798  |
| 1  | -0.099458 | -2.317193 | 1.030026  |
| 17 | -2.196668 | 0.223197  | -0.984702 |
| 6  | 5.915771  | 1.779609  | -1.173315 |
| 6  | 5.236428  | 1.706739  | -2.391836 |
| 6  | 3.996097  | 2.332563  | -2.538570 |
| 6  | 3.435107  | 3.031257  | -1.466783 |
| 6  | 4.114450  | 3.104126  | -0.248262 |
| 6  | 5.354781  | 2.478302  | -0.101528 |
| 1  | 6.880868  | 1.292657  | -1.059142 |
| 1  | 5.672932  | 1.163088  | -3.225789 |
| 1  | 3.467503  | 2.275863  | -3.486696 |
| 1  | 2.470010  | 3.518208  | -1.580956 |
| 1  | 3.677946  | 3.647777  | 0.585691  |
| 1  | 5.883375  | 2.535002  | 0.846598  |

9. The coordinates of  $[\text{ZnCl}_2(\text{H}_2\text{O})_2] / \text{C}_6\text{H}_6$  system, with  $r=0.0 \text{ \AA}$  and  $R=2.8 \text{ \AA}$

|    |           |           |           |
|----|-----------|-----------|-----------|
| 30 | -0.590764 | -0.000876 | 0.700991  |
| 17 | 0.694525  | -0.002304 | 2.545387  |
| 8  | 0.152825  | 1.740551  | -0.280062 |
| 1  | 0.686674  | 2.283291  | 0.318539  |
| 1  | -0.563941 | 2.294534  | -0.622205 |
| 8  | 0.155502  | -1.738535 | -0.284847 |
| 1  | -0.561460 | -2.292286 | -0.627006 |
| 1  | 0.690525  | -2.282023 | 0.312019  |
| 17 | -2.723888 | -0.002352 | -0.002817 |
| 6  | -1.697925 | 4.804950  | -2.105880 |
| 6  | -2.200147 | 4.954762  | -0.810914 |
| 6  | -3.138633 | 4.045856  | -0.316198 |
| 6  | -3.574896 | 2.987139  | -1.116448 |
| 6  | -3.072674 | 2.837327  | -2.411415 |
| 6  | -2.134189 | 3.746233  | -2.906131 |
| 1  | -0.967693 | 5.512166  | -2.490817 |
| 1  | -1.860692 | 5.778545  | -0.188242 |
| 1  | -3.529410 | 4.162423  | 0.691411  |
| 1  | -4.305128 | 2.279923  | -0.731512 |
| 1  | -3.412129 | 2.013544  | -3.034086 |
| 1  | -1.743412 | 3.629665  | -3.913739 |

10. The coordinates of  $[\text{ZnCl}_2(\text{H}_2\text{O})_2] / \text{C}_6\text{H}_6$  system, with  $r=0.6 \text{ \AA}$  and  $R=2.4 \text{ \AA}$

|    |           |           |          |
|----|-----------|-----------|----------|
| 30 | -0.590764 | -0.000876 | 0.700991 |
| 17 | 0.694525  | -0.002304 | 2.545387 |

|    |           |           |           |
|----|-----------|-----------|-----------|
| 8  | 0.152825  | 1.740551  | -0.280062 |
| 1  | 0.686674  | 2.283291  | 0.318539  |
| 1  | -0.563941 | 2.294534  | -0.622205 |
| 8  | 0.155502  | -1.738535 | -0.284847 |
| 1  | -0.561460 | -2.292286 | -0.627006 |
| 1  | 0.690525  | -2.282023 | 0.312019  |
| 17 | -2.723888 | -0.002352 | -0.002817 |
| 6  | -0.998756 | 4.966497  | -2.177051 |
| 6  | -1.435020 | 3.907779  | -2.977301 |
| 6  | -2.373505 | 2.998874  | -2.482585 |
| 6  | -2.875727 | 3.148685  | -1.187619 |
| 6  | -2.439464 | 4.207402  | -0.387368 |
| 6  | -1.500978 | 5.116308  | -0.882084 |
| 1  | -0.268524 | 5.673712  | -2.561987 |
| 1  | -1.044243 | 3.791212  | -3.984910 |
| 1  | -2.712960 | 2.175090  | -3.105257 |
| 1  | -3.605959 | 2.441469  | -0.802682 |
| 1  | -2.830240 | 4.323970  | 0.620240  |
| 1  | -1.161523 | 5.940092  | -0.259412 |

11. The coordinates of  $[\text{ZnCl}(\text{H}_2\text{O})_5]^+ / \text{C}_6\text{H}_6$  system, with  $r=0.0 \text{ \AA}$  and  $R=2.2 \text{ \AA}$

|    |           |           |           |
|----|-----------|-----------|-----------|
| 30 | -0.071412 | -0.055372 | -0.109202 |
| 8  | 2.142075  | 0.360232  | -0.047661 |
| 1  | 2.277727  | 0.227417  | 0.908773  |
| 1  | 2.876403  | -0.076488 | -0.501754 |
| 17 | 0.122404  | -0.203672 | 2.200840  |
| 8  | -0.207172 | -0.006966 | -2.243103 |
| 1  | 0.173488  | -0.651812 | -2.853826 |
| 1  | -0.132693 | 0.868364  | -2.648433 |
| 8  | 0.035351  | 2.109240  | -0.445644 |
| 1  | 0.968219  | 2.313786  | -0.270109 |
| 1  | -0.479711 | 2.685983  | 0.137587  |
| 8  | 0.172933  | -2.208727 | -0.298427 |
| 1  | -0.590157 | -2.743691 | -0.561748 |
| 1  | 0.375609  | -2.475178 | 0.615154  |
| 8  | -2.214985 | -0.154115 | 0.044908  |
| 1  | -2.501341 | -0.130244 | 0.970941  |
| 1  | -2.946738 | 0.141244  | -0.512296 |
| 6  | 5.445834  | -0.192000 | -0.924048 |
| 6  | 4.878033  | 0.135819  | -2.157639 |
| 6  | 3.978703  | -0.741862 | -2.767959 |
| 6  | 3.647174  | -1.947362 | -2.144687 |
| 6  | 4.214974  | -2.275181 | -0.911096 |
| 6  | 5.114304  | -1.397499 | -0.300777 |

|   |          |           |           |
|---|----------|-----------|-----------|
| 1 | 6.145599 | 0.490921  | -0.449161 |
| 1 | 5.135995 | 1.073814  | -2.642604 |
| 1 | 3.536900 | -0.486788 | -3.727811 |
| 1 | 2.947409 | -2.630283 | -2.619575 |
| 1 | 3.957012 | -3.213175 | -0.426132 |
| 1 | 5.556107 | -1.652574 | 0.659075  |

12. The coordinates of  $[\text{ZnCl}(\text{H}_2\text{O})_5]^+ / \text{C}_6\text{H}_6$  system, with  $r=0.6 \text{ \AA}$  and  $R=2.2 \text{ \AA}$

|    |           |           |           |
|----|-----------|-----------|-----------|
| 30 | -0.071412 | -0.055372 | -0.109202 |
| 8  | 2.142075  | 0.360232  | -0.047661 |
| 1  | 2.277727  | 0.227417  | 0.908773  |
| 1  | 2.876403  | -0.076488 | -0.501754 |
| 17 | 0.122404  | -0.203672 | 2.200840  |
| 8  | -0.207172 | -0.006966 | -2.243103 |
| 1  | 0.173488  | -0.651812 | -2.853826 |
| 1  | -0.132693 | 0.868364  | -2.648433 |
| 8  | 0.035351  | 2.109240  | -0.445644 |
| 1  | 0.968219  | 2.313786  | -0.270109 |
| 1  | -0.479711 | 2.685983  | 0.137587  |
| 8  | 0.172933  | -2.208727 | -0.298427 |
| 1  | -0.590157 | -2.743691 | -0.561748 |
| 1  | 0.375609  | -2.475178 | 0.615154  |
| 8  | -2.214985 | -0.154115 | 0.044908  |
| 1  | -2.501341 | -0.130244 | 0.970941  |
| 1  | -2.946738 | 0.141244  | -0.512296 |
| 6  | 5.832088  | 0.184957  | -0.661921 |
| 6  | 5.500559  | -1.020543 | -0.038650 |
| 6  | 4.601229  | -1.898224 | -0.648969 |
| 6  | 4.033428  | -1.570405 | -1.882560 |
| 6  | 4.364958  | -0.364906 | -2.505832 |
| 6  | 5.264288  | 0.512776  | -1.895512 |
| 1  | 6.531853  | 0.867878  | -0.187034 |
| 1  | 5.942362  | -1.275617 | 0.921202  |
| 1  | 4.343267  | -2.836219 | -0.164004 |
| 1  | 3.333663  | -2.253326 | -2.357447 |
| 1  | 3.923155  | -0.109831 | -3.465684 |
| 1  | 5.522250  | 1.450770  | -2.380477 |

13. The coordinates of  $[\text{Zn}(\text{H}_2\text{O})_6]^{2+} / \text{C}_6\text{H}_6$  system, with  $r=0.0 \text{ \AA}$  and  $R=2.1 \text{ \AA}$

|    |          |           |          |
|----|----------|-----------|----------|
| 30 | 0.000000 | 0.000000  | 0.000000 |
| 8  | 2.131219 | 0.000000  | 0.000000 |
| 1  | 2.705854 | -0.000354 | 0.779276 |

|   |           |           |           |
|---|-----------|-----------|-----------|
| 1 | 2.705854  | 0.000354  | -0.779276 |
| 8 | 0.000000  | 0.000000  | 2.131219  |
| 1 | -0.000354 | 0.779276  | 2.705854  |
| 1 | 0.000354  | -0.779276 | 2.705854  |
| 8 | 0.000000  | 0.000000  | -2.131219 |
| 1 | -0.000354 | -0.779276 | -2.705854 |
| 1 | 0.000354  | 0.779276  | -2.705854 |
| 8 | 0.000000  | 2.131219  | 0.000000  |
| 1 | 0.779276  | 2.705854  | -0.000354 |
| 1 | -0.779276 | 2.705854  | 0.000354  |
| 8 | 0.000000  | -2.131219 | 0.000000  |
| 1 | -0.779276 | -2.705854 | -0.000354 |
| 1 | 0.779276  | -2.705854 | 0.000354  |
| 8 | -2.131219 | 0.000000  | 0.000000  |
| 1 | -2.705854 | 0.000354  | 0.779276  |
| 1 | -2.705854 | -0.000354 | -0.779276 |
| 6 | 5.076265  | -0.000859 | 1.640408  |
| 6 | 4.514047  | -1.210913 | 2.054277  |
| 6 | 3.389610  | -1.211347 | 2.883283  |
| 6 | 2.827392  | -0.001727 | 3.298420  |
| 6 | 3.389610  | 1.208327  | 2.884550  |
| 6 | 4.514047  | 1.208761  | 2.055544  |
| 1 | 5.951184  | -0.000521 | 0.995361  |
| 1 | 4.951506  | -2.152114 | 1.731261  |
| 1 | 2.952150  | -2.152886 | 3.205314  |
| 1 | 1.952472  | -0.002065 | 3.943466  |
| 1 | 2.952150  | 2.149528  | 3.207566  |
| 1 | 4.951506  | 2.150300  | 1.733514  |

14. The coordinates of  $[Zn(H_2O)_6]^{2+} / C_6H_6$  system, with  $r=0.6 \text{ \AA}$  and  $R=2.1 \text{ \AA}$

|    |           |           |           |
|----|-----------|-----------|-----------|
| 30 | 0.000000  | 0.000000  | 0.000000  |
| 8  | 2.131219  | 0.000000  | 0.000000  |
| 1  | 2.705854  | -0.000354 | 0.779276  |
| 1  | 2.705854  | 0.000354  | -0.779276 |
| 8  | 0.000000  | 0.000000  | 2.131219  |
| 1  | -0.000354 | 0.779276  | 2.705854  |
| 1  | 0.000354  | -0.779276 | 2.705854  |
| 8  | 0.000000  | 0.000000  | -2.131219 |
| 1  | -0.000354 | -0.779276 | -2.705854 |
| 1  | 0.000354  | 0.779276  | -2.705854 |
| 8  | 0.000000  | 2.131219  | 0.000000  |
| 1  | 0.779276  | 2.705854  | -0.000354 |
| 1  | -0.779276 | 2.705854  | 0.000354  |
| 8  | 0.000000  | -2.131219 | 0.000000  |

|   |           |           |           |
|---|-----------|-----------|-----------|
| 1 | -0.779276 | -2.705854 | -0.000354 |
| 1 | 0.779276  | -2.705854 | 0.000354  |
| 8 | -2.131219 | 0.000000  | 0.000000  |
| 1 | -2.705854 | 0.000354  | 0.779276  |
| 1 | -2.705854 | -0.000354 | -0.779276 |
| 6 | 5.559201  | -0.000672 | 1.284356  |
| 6 | 4.996983  | 1.208948  | 1.699493  |
| 6 | 3.872546  | 1.208514  | 2.528499  |
| 6 | 3.310328  | -0.001541 | 2.942369  |
| 6 | 3.872546  | -1.211161 | 2.527232  |
| 6 | 4.996983  | -1.210727 | 1.698226  |
| 1 | 6.434121  | -0.000335 | 0.639310  |
| 1 | 5.434443  | 2.150486  | 1.377463  |
| 1 | 3.435086  | 2.149714  | 2.851515  |
| 1 | 2.435408  | -0.001878 | 3.587415  |
| 1 | 3.435086  | -2.152699 | 2.849262  |
| 1 | 5.434443  | -2.151927 | 1.375210  |

### III The coordinates of water/benzene and aqua-complex/benzene systems at R distance of 3.0 Å, given in Table 3.

#### 1. The coordinates of H<sub>2</sub>O / C<sub>6</sub>H<sub>6</sub> system, with r=0.0 Å and R= 3.0 Å

|   |           |           |           |
|---|-----------|-----------|-----------|
| 8 | -0.186925 | -1.878217 | -0.133582 |
| 1 | 0.300096  | -2.263623 | 0.604882  |
| 1 | 0.329691  | -2.130366 | -0.908574 |
| 6 | 2.759205  | -3.975974 | 2.009445  |
| 6 | 2.935832  | -2.703076 | 2.557297  |
| 6 | 1.990988  | -2.189037 | 3.448724  |
| 6 | 0.869517  | -2.947897 | 3.792300  |
| 6 | 0.692890  | -4.220795 | 3.244448  |
| 6 | 1.637734  | -4.734834 | 2.353021  |
| 1 | 3.494384  | -4.375946 | 1.315829  |
| 1 | 3.808444  | -2.112611 | 2.289962  |
| 1 | 2.128421  | -1.198600 | 3.875006  |
| 1 | 0.134338  | -2.547925 | 4.485916  |
| 1 | -0.179722 | -4.811260 | 3.511783  |
| 1 | 1.500301  | -5.725271 | 1.926739  |



2. The coordinates of  $[\text{ScCl}_3(\text{H}_2\text{O})_3] / \text{C}_6\text{H}_6$  system, with  $r=0.0 \text{ \AA}$  and  $R= 3.0 \text{ \AA}$

|    |           |           |           |
|----|-----------|-----------|-----------|
| 21 | -0.078925 | -0.077714 | 0.079922  |
| 8  | 2.171682  | 0.312678  | -0.055828 |
| 1  | 2.551836  | 0.005408  | 0.782244  |
| 1  | 2.580316  | -0.209194 | -0.761536 |
| 17 | 0.314909  | 0.313209  | 2.369099  |
| 8  | 0.311972  | 0.053190  | -2.171851 |
| 1  | 0.010347  | -0.789829 | -2.545763 |
| 1  | -0.217830 | 0.751608  | -2.582865 |
| 8  | 0.055831  | 2.173135  | -0.310809 |
| 1  | 0.756509  | 2.582043  | 0.217631  |
| 1  | -0.785407 | 2.550634  | -0.008842 |
| 17 | 0.310738  | -2.367803 | -0.312471 |
| 17 | -2.367980 | 0.316634  | -0.312932 |
| 6  | 2.619531  | 5.093719  | 1.299861  |
| 6  | 3.564705  | 4.269142  | 0.684776  |
| 6  | 3.872548  | 3.024622  | 1.239762  |
| 6  | 3.235219  | 2.604678  | 2.409834  |
| 6  | 2.290046  | 3.429255  | 3.024919  |
| 6  | 1.982202  | 4.673775  | 2.469933  |
| 1  | 2.380000  | 6.062076  | 0.868029  |
| 1  | 4.060608  | 4.595899  | -0.225652 |
| 1  | 4.607984  | 2.383022  | 0.761167  |
| 1  | 3.474751  | 1.636322  | 2.841666  |
| 1  | 1.794142  | 3.102498  | 3.935347  |
| 1  | 1.246766  | 5.315375  | 2.948528  |

3. The coordinates of *cis*- $[\text{ZnCl}_2(\text{H}_2\text{O})_4] / \text{C}_6\text{H}_6$  system, with  $r=0.0 \text{ \AA}$  and  $R= 3.0 \text{ \AA}$

|    |           |           |           |
|----|-----------|-----------|-----------|
| 30 | 0.230000  | 0.007000  | -0.226000 |
| 8  | 2.422000  | -0.041000 | -0.419000 |
| 1  | 2.608000  | -0.050000 | 0.540000  |
| 1  | 2.776000  | 0.791000  | -0.763000 |
| 17 | 0.803000  | -0.117000 | 2.141000  |
| 8  | 0.386000  | -0.066000 | -2.421000 |
| 1  | 0.679000  | -0.934000 | -2.734000 |
| 1  | -0.574000 | -0.016000 | -2.592000 |
| 8  | 0.202000  | 2.188000  | 0.071000  |
| 1  | 0.253000  | 2.179000  | 1.043000  |
| 1  | -0.734000 | 2.357000  | -0.139000 |
| 8  | -0.181000 | -2.150000 | -0.082000 |
| 1  | -1.152000 | -2.093000 | -0.121000 |
| 1  | 0.035000  | -2.281000 | 0.858000  |
| 17 | -2.139000 | 0.228000  | -0.770000 |

|   |          |          |           |
|---|----------|----------|-----------|
| 6 | 5.164038 | 2.852936 | -1.758800 |
| 6 | 4.625360 | 3.533065 | -0.663876 |
| 6 | 3.330730 | 4.053437 | -0.732834 |
| 6 | 2.574778 | 3.893680 | -1.896717 |
| 6 | 3.113456 | 3.213551 | -2.991641 |
| 6 | 4.408086 | 2.693179 | -2.922683 |
| 1 | 6.171384 | 2.448036 | -1.705143 |
| 1 | 5.213563 | 3.657371 | 0.241737  |
| 1 | 2.911587 | 4.582643 | 0.119122  |
| 1 | 1.567432 | 4.298580 | -1.950374 |
| 1 | 2.525253 | 3.089245 | -3.897254 |
| 1 | 4.827229 | 2.163973 | -3.774639 |

4. The coordinates of *cis*-[CdCl<sub>2</sub>(H<sub>2</sub>O)<sub>4</sub>] / C<sub>6</sub>H<sub>6</sub> system, with *r*=0.0 Å and *R*= 3.0 Å

|    |           |           |           |
|----|-----------|-----------|-----------|
| 48 | 0.280048  | -0.002515 | -0.281720 |
| 8  | 2.648013  | -0.054534 | -0.386562 |
| 1  | 2.731095  | -0.076217 | 0.588068  |
| 1  | 3.090375  | 0.752882  | -0.681366 |
| 17 | 0.965336  | -0.116765 | 2.208727  |
| 8  | 0.392699  | -0.062103 | -2.649408 |
| 1  | 0.645859  | -0.896789 | -3.065994 |
| 1  | -0.578958 | 0.010001  | -2.738273 |
| 8  | 0.060987  | 2.326832  | 0.163404  |
| 1  | 0.122180  | 2.280294  | 1.132547  |
| 1  | -0.887236 | 2.403991  | -0.038923 |
| 8  | -0.297615 | -2.283495 | 0.078378  |
| 1  | -1.262658 | -2.187585 | 0.011798  |
| 1  | -0.099458 | -2.317193 | 1.030026  |
| 17 | -2.196668 | 0.223197  | -0.984702 |
| 6  | 5.703321  | 2.633068  | -1.449852 |
| 6  | 5.142332  | 3.331762  | -0.378065 |
| 6  | 3.902001  | 3.957586  | -0.524799 |
| 6  | 3.222658  | 3.884716  | -1.743320 |
| 6  | 3.783648  | 3.186022  | -2.815106 |
| 6  | 5.023979  | 2.560198  | -2.668372 |
| 1  | 6.668418  | 2.146117  | -1.335678 |
| 1  | 5.670926  | 3.388461  | 0.570061  |
| 1  | 3.465497  | 4.501237  | 0.309154  |
| 1  | 2.257561  | 4.371667  | -1.857493 |
| 1  | 3.255054  | 3.129322  | -3.763233 |
| 1  | 5.460483  | 2.016547  | -3.502325 |

5. The coordinates of  $[\text{ZnCl}_2(\text{H}_2\text{O})_2] / \text{C}_6\text{H}_6$  system, with  $r=0.0 \text{ \AA}$  and  $R= 3.0 \text{ \AA}$

|    |           |           |           |
|----|-----------|-----------|-----------|
| 30 | -0.590764 | -0.000876 | 0.700991  |
| 17 | 0.694525  | -0.002304 | 2.545387  |
| 8  | 0.152825  | 1.740551  | -0.280062 |
| 1  | 0.686674  | 2.283291  | 0.318539  |
| 1  | -0.563941 | 2.294534  | -0.622205 |
| 8  | 0.155502  | -1.738535 | -0.284847 |
| 1  | -0.561460 | -2.292286 | -0.627006 |
| 1  | 0.690525  | -2.282023 | 0.312019  |
| 17 | -2.723888 | -0.002352 | -0.002817 |
| 6  | -1.845974 | 4.919360  | -2.176533 |
| 6  | -2.348196 | 5.069172  | -0.881567 |
| 6  | -3.286681 | 4.160266  | -0.386851 |
| 6  | -3.722945 | 3.101549  | -1.187101 |
| 6  | -3.220723 | 2.951738  | -2.482068 |
| 6  | -2.282237 | 3.860643  | -2.976784 |
| 1  | -1.115742 | 5.626576  | -2.561470 |
| 1  | -2.008741 | 5.892956  | -0.258895 |
| 1  | -3.677458 | 4.276834  | 0.620758  |
| 1  | -4.453177 | 2.394333  | -0.802165 |
| 1  | -3.560178 | 2.127954  | -3.104739 |
| 1  | -1.891460 | 3.744076  | -3.984392 |

6. The coordinates of  $[\text{ZnCl}(\text{H}_2\text{O})_5]^+ / \text{C}_6\text{H}_6$  system, with  $r=0.0 \text{ \AA}$  and  $R= 3.0 \text{ \AA}$

|    |           |           |           |
|----|-----------|-----------|-----------|
| 30 | -0.071412 | -0.055372 | -0.109202 |
| 8  | 2.142075  | 0.360232  | -0.047661 |
| 1  | 2.277727  | 0.227417  | 0.908773  |
| 1  | 2.876403  | -0.076488 | -0.501754 |
| 17 | 0.122404  | -0.203672 | 2.200840  |
| 8  | -0.207172 | -0.006966 | -2.243103 |
| 1  | 0.173488  | -0.651812 | -2.853826 |
| 1  | -0.132693 | 0.868364  | -2.648433 |
| 8  | 0.035351  | 2.109240  | -0.445644 |
| 1  | 0.968219  | 2.313786  | -0.270109 |
| 1  | -0.479711 | 2.685983  | 0.137587  |
| 8  | 0.172933  | -2.208727 | -0.298427 |
| 1  | -0.590157 | -2.743691 | -0.561748 |
| 1  | 0.375609  | -2.475178 | 0.615154  |
| 8  | -2.214985 | -0.154115 | 0.044908  |
| 1  | -2.501341 | -0.130244 | 0.970941  |
| 1  | -2.946738 | 0.141244  | -0.512296 |
| 6  | 6.053012  | -0.553089 | -1.299479 |
| 6  | 5.485212  | -0.225270 | -2.533070 |

|   |          |           |           |
|---|----------|-----------|-----------|
| 6 | 4.585882 | -1.102952 | -3.143390 |
| 6 | 4.254352 | -2.308452 | -2.520118 |
| 6 | 4.822153 | -2.636270 | -1.286527 |
| 6 | 5.721483 | -1.758589 | -0.676208 |
| 1 | 6.752777 | 0.129831  | -0.824592 |
| 1 | 5.743174 | 0.712724  | -3.018035 |
| 1 | 4.144079 | -0.847877 | -4.103242 |
| 1 | 3.554587 | -2.991372 | -2.995006 |
| 1 | 4.564191 | -3.574265 | -0.801562 |
| 1 | 6.163286 | -2.013663 | 0.283644  |

7. The coordinates of  $[Zn(H_2O)_6]^{2+} / C_6H_6$  system, with  $r=0.0 \text{ \AA}$  and  $R= 3.0 \text{ \AA}$

|    |           |           |           |
|----|-----------|-----------|-----------|
| 30 | 0.000000  | 0.000000  | 0.000000  |
| 8  | 2.131219  | 0.000000  | 0.000000  |
| 1  | 2.705854  | -0.000354 | 0.779276  |
| 1  | 2.705854  | 0.000354  | -0.779276 |
| 8  | 0.000000  | 0.000000  | 2.131219  |
| 1  | -0.000354 | 0.779276  | 2.705854  |
| 1  | 0.000354  | -0.779276 | 2.705854  |
| 8  | 0.000000  | 0.000000  | -2.131219 |
| 1  | -0.000354 | -0.779276 | -2.705854 |
| 1  | 0.000354  | 0.779276  | -2.705854 |
| 8  | 0.000000  | 2.131219  | 0.000000  |
| 1  | 0.779276  | 2.705854  | -0.000354 |
| 1  | -0.779276 | 2.705854  | 0.000354  |
| 8  | 0.000000  | -2.131219 | 0.000000  |
| 1  | -0.779276 | -2.705854 | -0.000354 |
| 1  | 0.779276  | -2.705854 | 0.000354  |
| 8  | -2.131219 | 0.000000  | 0.000000  |
| 1  | -2.705854 | 0.000354  | 0.779276  |
| 1  | -2.705854 | -0.000354 | -0.779276 |
| 6  | 5.610342  | -0.001238 | 2.364812  |
| 6  | 5.048124  | -1.211293 | 2.778682  |
| 6  | 3.923687  | -1.211727 | 3.607688  |
| 6  | 3.361469  | -0.002106 | 4.022824  |
| 6  | 3.923687  | 1.207948  | 3.608955  |
| 6  | 5.048124  | 1.208382  | 2.779949  |
| 1  | 6.485261  | -0.000900 | 1.719766  |
| 1  | 5.485583  | -2.152493 | 2.455666  |
| 1  | 3.486227  | -2.153265 | 3.929718  |
| 1  | 2.486549  | -0.002444 | 4.667870  |
| 1  | 3.486227  | 2.149149  | 3.931971  |
| 1  | 5.485583  | 2.149920  | 2.457918  |
